# Supplementary material for: Perceived Barriers to Pregnancy Vaccination Plans in Chile: A Qualitative Analysis
Source: Research Square preprint supplement (doi:10.21203/rs.3.rs-7871693/v1), 2025-11-19
Supplement: Supplementary file 1 [file 4a52ce7870999a508a88ddc6.docx]

**SUPPLEMENTARY FILES**

**Supplementary file 1**. Description of the study´s context in Chile.

| City |  | Location | Population Size | Climate | % international migrants | Economic Profile |
| --- | --- | --- | --- | --- | --- | --- |
| Antofagasta |  | Northern Chile, Pacific coast, Atacama Desert | ~400,000 | Desert climate (BWh): arid, mild temperatures, very low rainfall | 19% | Mining hub: contributes 72% of regional GDP, major copper and lithium producer |
| Santiago |  | Central Chile, valley surrounded by Andes | ~6.3 million | Mediterranean climate (Csb): hot dry summers, cool wet winters | 22% | National economic center: high GDP per capita (~USD 15,158), strong finance, services |
| Osorno |  | Southern Chile, near Andes and Pacific coast | ~150,000 | Oceanic climate (Cfb): cool, rainy year-round, mild summers | 6% | Agricultural base: exports include frozen meat, fuel wood, growing trade sector |

**Supplementary information 2**. Semi-structured interview guide.

| **Pregnancy Vaccination** | | |
| --- | --- | --- |
| **Age** | **Vacuna** | **Protects against** |
| Pregnant from 28 weeks of gestation | Tdap | Diphtheria, Tetanus, and Pertussis |

| 1. **Barriers and Facilitators to Vaccination of Pregnant Women**  - Did you receive this vaccine? - Where did you receive it? - What do you think are the main barriers that pregnant women face when receiving this vaccination? - Did you have any specific negative experiences with this vaccination? - Are there any factors that you believe facilitate the vaccination of pregnant women? If so, which ones? - Did you have any specific positive experiences with this vaccination? - Do you see any barriers or obstacles to the vaccination of pregnant women within the healthcare system? - Are there any barriers or obstacles to vaccination of pregnant women that come from your family or friends? - Are there any barriers or obstacles to vaccination of pregnant women that you have encountered in your workplace? |
| --- |
| 1. **Emotions Surrounding Vaccination in Pregnant Women**  - Do you have any concerns about vaccinating pregnant women? If so, what are they? - Are there specific fears you have regarding the vaccination process? What are those fears? - Have you encountered any information that reinforces your feelings of fear and apprehension? - What sources of information have contributed to these emotions? |
| 1. **Recommendations**  - What is your overall assessment of the vaccination process for pregnant women? Are you generally satisfied or dissatisfied, and why? - What main factors influenced your rating of the overall experience as favourable or unfavourable? - Could you provide recommendations for improving the immunization plan for pregnant women in Chile? |
| 1. **Questions for the International Migrant Population**  - How do you compare the national immunization plan for pregnant women in Chile to that of your country of origin? - What aspects of living in Chile do you find most positive? - What aspects of living in Chile do you consider most negative? - Are there specific barriers or obstacles that migrants face when trying to vaccinate pregnant women? - What factors facilitate vaccination for migrants with pregnant women?   Potential Barriers to Vaccination:  *Administrative Barriers:   - Is registration with the health system required? - Do you need a RUT (Tax ID number)? - Can you get vaccinated if you entered the country through an unauthorized crossing?   *Financial Barriers:   - What is the cost of traveling to the vaccination site? - How does the time spent getting vaccinated impact your ability to work?   *Personal Barriers:   - Are there language difficulties? - Do you have permanent caregivers available? - Does your work (whether informal or formal) provide time off for vaccination?   *Health Team Barriers:   - Have you ever experienced refusals to vaccinate migrants? - Have you received poor treatment from health professionals? - What challenges do migrants vaccinated outside of Chile face when continuing their vaccination in Chile? Is this process possible? |
